# Supplementary material
Source: PubMed Central journal article supplement (PMC5626455)
Supplement: NIHMS896896-supplement-2.pdf [file NIHMS896896-supplement-2.pdf]

## **Supplementary Tables S1-S10**

**“A multikinase and DNA-PK inhibitor combination immunomodulates melanomas, suppresses tumor progression, and enhances immunotherapies”**

**Tsai, et al.**

**Supplementary Table S1: Human melanoma cell lines and mutation status**

| <b>Cell Line</b> | <b>BRAF</b> | <b>NRAS</b> |
|------------------|-------------|-------------|
| 624-Mel          | V600E       | WT          |
| A375             | V600E       | WT          |
| C32              | V600E       | WT          |
| COLO-829         | V600E       | WT          |
| G-361            | V600E       | WT          |
| LOX-IMVI         | V600E       | WT          |
| Malme-3M         | V600E       | WT          |
| MNT-1            | V600E       | WT          |
| RPMI-7951        | V600E       | WT          |
| SK-MEL-5         | V600E       | WT          |
| SK-MEL-24        | V600E       | WT          |
| SK-MEL-28        | V600E       | WT          |
| UACC-62          | V600E       | WT          |
| UACC-257         | V600E       | WT          |
| WM-115           | V600D       | WT          |
| WM-266-4         | V600D       | WT          |
| Mel-Juso         | WT          | Q61L        |
| MM415            | WT          | Q61L        |
| MM485            | WT          | Q61R        |
| SK-MEL-2         | WT          | Q61R        |
| SK-MEL-30        | WT          | Q61R        |
| SK-MEL-103       | WT          | Q61R        |
| SK-MEL-119       | WT          | Q61R        |
| SK-MEL-147       | WT          | Q61R        |
| SK-MEL-173       | WT          | Q61K        |
| UCD-Mel-N        | WT          | Q61R        |
| C8161            | WT          | WT          |

Abbreviations: WT = wild-type

**Supplementary Table S2: Differences in PD-L1 and CD155 drug responses between BRAF- and NRAS-mutant cell lines**

| <b>PD-L1</b>    |                      |                      |                       |                                 |
|-----------------|----------------------|----------------------|-----------------------|---------------------------------|
| <b>Variable</b> | <b>BRAF (N = 16)</b> | <b>NRAS (N = 10)</b> | <b>Total (N = 26)</b> | <b>P-value</b>                  |
| <b>Reg</b>      |                      |                      |                       | 0.15 <sup>1</sup>               |
| Mean±SD         | 0.82±0.2             | 0.72±0.13            | 0.79±0.18             |                                 |
| Median [Q1, Q3] | 0.85 [0.7, 1.01]     | 0.7 [0.64, 0.77]     | 0.75 [0.68, 0.97]     |                                 |
| Min, Max        | 0.37, 1.05           | 0.58, 1.03           | 0.37, 1.05            |                                 |
| <b>NU</b>       |                      |                      |                       | 0.07 <sup>1</sup>               |
| Mean±SD         | 0.66±0.19            | 0.51±0.2             | 0.6±0.2               |                                 |
| Median [Q1, Q3] | 0.65 [0.57, 0.74]    | 0.49 [0.39, 0.64]    | 0.59 [0.42, 0.73]     |                                 |
| Min, Max        | 0.36, 1.12           | 0.24, 0.81           | 0.24, 1.12            |                                 |
| <b>Reg+NU</b>   |                      |                      |                       | 0.07 <sup>1</sup>               |
| Mean±SD         | 0.52±0.27            | 0.36±0.16            | 0.46±0.24             |                                 |
| Median [Q1, Q3] | 0.44 [0.38, 0.6]     | 0.33 [0.25, 0.47]    | 0.4 [0.31, 0.58]      |                                 |
| Min, Max        | 0.25, 1.4            | 0.15, 0.63           | 0.15, 1.4             |                                 |
| <b>Vem</b>      |                      |                      |                       | <b>0.002<sup>1</sup> *</b>      |
| Mean±SD         | 0.96±0.23            | 1.43±0.39            | 1.14±0.37             |                                 |
| Median [Q1, Q3] | 0.92 [0.83, 1.12]    | 1.49 [1.11, 1.56]    | 1.09 [0.86, 1.37]     |                                 |
| Min, Max        | 0.59, 1.41           | 0.97, 2.28           | 0.59, 2.28            |                                 |
| <b>CD155</b>    |                      |                      |                       |                                 |
| <b>Variable</b> | <b>BRAF (N = 16)</b> | <b>NRAS (N = 10)</b> | <b>Total (N = 26)</b> | <b>P-value</b>                  |
| <b>Reg</b>      |                      |                      |                       | 0.09 <sup>1</sup>               |
| Mean±SD         | 0.74±0.11            | 0.61±0.22            | 0.69±0.17             |                                 |
| Median [Q1, Q3] | 0.76 [0.67, 0.83]    | 0.6 [0.52, 0.71]     | 0.7 [0.6, 0.83]       |                                 |
| Min, Max        | 0.52, 0.9            | 0.21, 0.95           | 0.21, 0.95            |                                 |
| <b>NU</b>       |                      |                      |                       | 0.06 <sup>1</sup>               |
| Mean±SD         | 0.6±0.14             | 0.5±0.12             | 0.56±0.14             |                                 |
| Median [Q1, Q3] | 0.6 [0.53, 0.66]     | 0.48 [0.42, 0.56]    | 0.58 [0.48, 0.64]     |                                 |
| Min, Max        | 0.35, 0.87           | 0.3, 0.71            | 0.3, 0.87             |                                 |
| <b>Reg+NU</b>   |                      |                      |                       | 0.27 <sup>1</sup>               |
| Mean±SD         | 0.47±0.21            | 0.41±0.26            | 0.45±0.23             |                                 |
| Median [Q1, Q3] | 0.42 [0.35, 0.57]    | 0.36 [0.33, 0.42]    | 0.39 [0.33, 0.54]     |                                 |
| Min, Max        | 0.16, 0.96           | 0.13, 1.06           | 0.13, 1.06            |                                 |
| <b>Vem</b>      |                      |                      |                       | <b>&lt; 0.001<sup>1</sup> *</b> |
| Mean±SD         | 0.72±0.18            | 1.1±0.16             | 0.86±0.25             |                                 |
| Median [Q1, Q3] | 0.76 [0.53, 0.83]    | 1.15 [1.02, 1.22]    | 0.84 [0.73, 1.04]     |                                 |
| Min, Max        | 0.45, 1.01           | 0.77, 1.27           | 0.45, 1.27            |                                 |

\* p < 0.05

<sup>1</sup> Mann-Whitney U Test

**Supplementary Table S3: Differences in HLA-I and CD73 drug responses between BRAF- and NRAS-mutant cell lines**

| <b>HLA-I</b>    |                      |                      |                       |                            |
|-----------------|----------------------|----------------------|-----------------------|----------------------------|
| <b>Variable</b> | <b>BRAF (N = 16)</b> | <b>NRAS (N = 9)</b>  | <b>Total (N = 25)</b> | <b>P-value</b>             |
| <b>Reg</b>      |                      |                      |                       | 0.65 <sup>1</sup>          |
| Mean±SD         | 1.32±0.41            | 1.34±0.4             | 1.32±0.4              |                            |
| Median [Q1, Q3] | 1.14 [1.08, 1.34]    | 1.31 [1.09, 1.44]    | 1.15 [1.08, 1.44]     |                            |
| Min, Max        | 0.95, 2.31           | 0.96, 2.27           | 0.95, 2.31            |                            |
| <b>NU</b>       |                      |                      |                       | 0.78 <sup>1</sup>          |
| Mean±SD         | 1.05±0.17            | 1.09±0.21            | 1.06±0.18             |                            |
| Median [Q1, Q3] | 1.06 [0.99, 1.21]    | 1.1 [0.89, 1.27]     | 1.06 [0.95, 1.21]     |                            |
| Min, Max        | 0.61, 1.28           | 0.79, 1.41           | 0.61, 1.41            |                            |
| <b>Reg+NU</b>   |                      |                      |                       | 0.73 <sup>1</sup>          |
| Mean±SD         | 1.53±0.86            | 1.39±0.49            | 1.48±0.74             |                            |
| Median [Q1, Q3] | 1.32 [1.14, 1.58]    | 1.26 [1.03, 1.58]    | 1.28 [1.14, 1.58]     |                            |
| Min, Max        | 0.97, 4.64           | 0.86, 2.32           | 0.86, 4.64            |                            |
| <b>Vem</b>      |                      |                      |                       | <b>0.005<sup>1</sup> *</b> |
| Mean±SD         | 1.33±0.56            | 0.86±0.15            | 1.16±0.51             |                            |
| Median [Q1, Q3] | 1.16 [1.05, 1.47]    | 0.89 [0.84, 0.91]    | 1.07 [0.87, 1.25]     |                            |
| Min, Max        | 0.67, 2.95           | 0.58, 1.07           | 0.58, 2.95            |                            |
| <b>CD73</b>     |                      |                      |                       |                            |
| <b>Variable</b> | <b>BRAF (N = 10)</b> | <b>NRAS (N = 10)</b> | <b>Total (N = 20)</b> | <b>P-value</b>             |
| <b>Reg</b>      |                      |                      |                       | 0.15 <sup>1</sup>          |
| Mean±SD         | 0.7±0.22             | 0.54±0.14            | 0.62±0.2              |                            |
| Median [Q1, Q3] | 0.67 [0.6, 0.86]     | 0.52 [0.51, 0.66]    | 0.63 [0.51, 0.69]     |                            |
| Min, Max        | 0.32, 1.05           | 0.24, 0.71           | 0.24, 1.05            |                            |
| <b>NU</b>       |                      |                      |                       | 0.55 <sup>1</sup>          |
| Mean±SD         | 0.67±0.3             | 0.54±0.13            | 0.61±0.24             |                            |
| Median [Q1, Q3] | 0.59 [0.42, 0.94]    | 0.5 [0.46, 0.67]     | 0.51 [0.45, 0.72]     |                            |
| Min, Max        | 0.34, 1.09           | 0.35, 0.73           | 0.34, 1.09            |                            |
| <b>Reg+NU</b>   |                      |                      |                       | 0.13 <sup>1</sup>          |
| Mean±SD         | 0.46±0.29            | 0.29±0.12            | 0.37±0.23             |                            |
| Median [Q1, Q3] | 0.33 [0.28, 0.48]    | 0.27 [0.24, 0.32]    | 0.29 [0.26, 0.41]     |                            |
| Min, Max        | 0.22, 1.01           | 0.13, 0.57           | 0.13, 1.01            |                            |
| <b>Vem</b>      |                      |                      |                       | <b>0.001<sup>1</sup> *</b> |
| Mean±SD         | 0.91±0.31            | 1.46±0.27            | 1.18±0.4              |                            |
| Median [Q1, Q3] | 1.02 [0.64, 1.14]    | 1.39 [1.29, 1.69]    | 1.2 [1.05, 1.38]      |                            |
| Min, Max        | 0.36, 1.28           | 1.08, 1.84           | 0.36, 1.84            |                            |

\* p < 0.05

<sup>1</sup> Mann-Whitney U Test

**Supplementary Table S4: Differences in NGFR and CD55 drug responses between BRAF- and NRAS-mutant cell lines**

| <b>NGFR</b>     |                      |                     |                       |                        |
|-----------------|----------------------|---------------------|-----------------------|------------------------|
| <b>Variable</b> | <b>BRAF (N = 8)</b>  | <b>NRAS (N = 8)</b> | <b>Total (N = 16)</b> | <b>P-value</b>         |
| <b>Reg</b>      |                      |                     |                       |                        |
| Mean±SD         | 0.81±0.42            | 0.97±0.79           | 0.89±0.62             | 0.83 <sup>1</sup>      |
| Median [Q1, Q3] | 0.71 [0.53, 0.94]    | 0.66 [0.6, 1]       | 0.66 [0.56, 1]        |                        |
| Min, Max        | 0.38, 1.63           | 0.29, 2.81          | 0.29, 2.81            |                        |
| <b>NU</b>       |                      |                     |                       |                        |
| Mean±SD         | 0.76±0.13            | 0.65±0.12           | 0.7±0.14              | 0.14 <sup>1</sup>      |
| Median [Q1, Q3] | 0.77 [0.68, 0.85]    | 0.65 [0.56, 0.7]    | 0.7 [0.6, 0.8]        |                        |
| Min, Max        | 0.54, 0.94           | 0.47, 0.84          | 0.47, 0.94            |                        |
| <b>Reg+NU</b>   |                      |                     |                       |                        |
| Mean±SD         | 0.63±0.35            | 0.71±0.54           | 0.67±0.44             | 0.92 <sup>1</sup>      |
| Median [Q1, Q3] | 0.54 [0.4, 0.74]     | 0.65 [0.36, 0.86]   | 0.58 [0.39, 0.86]     |                        |
| Min, Max        | 0.26, 1.3            | 0.11, 1.86          | 0.11, 1.86            |                        |
| <b>Vem</b>      |                      |                     |                       |                        |
| Mean±SD         | 1.08±0.48            | 1.1±0.21            | 1.09±0.36             | 0.4 <sup>1</sup>       |
| Median [Q1, Q3] | 0.96 [0.87, 1.29]    | 1.05 [1, 1.15]      | 1.02 [0.93, 1.29]     |                        |
| Min, Max        | 0.4, 2.03            | 0.83, 1.49          | 0.4, 2.03             |                        |
| <b>CD55</b>     |                      |                     |                       |                        |
| <b>Variable</b> | <b>BRAF (N = 15)</b> | <b>NRAS (N = 9)</b> | <b>Total (N = 24)</b> | <b>P-value</b>         |
| <b>Reg</b>      |                      |                     |                       |                        |
| Mean±SD         | 0.75±0.2             | 0.73±0.13           | 0.74±0.17             | 0.79 <sup>1</sup>      |
| Median [Q1, Q3] | 0.71 [0.6, 0.94]     | 0.69 [0.66, 0.83]   | 0.7 [0.61, 0.9]       |                        |
| Min, Max        | 0.42, 1.07           | 0.54, 0.91          | 0.42, 1.07            |                        |
| <b>NU</b>       |                      |                     |                       |                        |
| Mean±SD         | 0.88±0.42            | 0.63±0.1            | 0.78±0.36             | 0.07 <sup>1</sup>      |
| Median [Q1, Q3] | 0.83 [0.64, 1]       | 0.59 [0.57, 0.69]   | 0.67 [0.58, 0.84]     |                        |
| Min, Max        | 0.49, 2.17           | 0.5, 0.81           | 0.49, 2.17            |                        |
| <b>Reg+NU</b>   |                      |                     |                       |                        |
| Mean±SD         | 0.56±0.32            | 0.48±0.12           | 0.53±0.26             | 0.79 <sup>1</sup>      |
| Median [Q1, Q3] | 0.47 [0.4, 0.54]     | 0.49 [0.44, 0.56]   | 0.47 [0.42, 0.55]     |                        |
| Min, Max        | 0.23, 1.48           | 0.25, 0.65          | 0.23, 1.48            |                        |
| <b>Vem</b>      |                      |                     |                       |                        |
| Mean±SD         | 0.77±0.21            | 1.61±0.53           | 1.08±0.54             | < 0.001 <sup>1</sup> * |
| Median [Q1, Q3] | 0.75 [0.64, 0.95]    | 1.41 [1.21, 1.67]   | 1.02 [0.74, 1.23]     |                        |
| Min, Max        | 0.42, 1.06           | 1.15, 2.6           | 0.42, 2.6             |                        |

\* p < 0.05

<sup>1</sup> Mann-Whitney U Test

**Supplementary Table S5: Differences in PD-L1, CD155, and HLA-I drug responses in BRAF-mutant cell lines**

| PD-L1<br>(BRAF-mutant cell lines) |              |              |                 |              |                |                      |
|-----------------------------------|--------------|--------------|-----------------|--------------|----------------|----------------------|
| Variable                          | NU (N = 16)  | Reg (N = 16) | Reg+NU (N = 16) | Vem (N = 16) | Total (N = 64) | P-value <sup>1</sup> |
| Mean±SD                           | 0.66±0.19    | 0.82±0.2     | 0.52±0.27       | 0.96±0.23    | 0.74±0.28      | < 0.001 *            |
| Median                            | 0.65         | 0.85         | 0.44            | 0.92         | 0.7            |                      |
| [Q1, Q3]                          | [0.57, 0.74] | [0.7, 1.01]  | [0.38, 0.6]     | [0.83, 1.12] | [0.58, 0.91]   |                      |
| Min, Max                          | 0.36, 1.12   | 0.37, 1.05   | 0.25, 1.4       | 0.59, 1.41   | 0.25, 1.41     |                      |
|                                   | •            | •            | •               | •            |                | 0.019 *              |
|                                   | •            |              |                 |              |                | 0.017 *              |
|                                   | •            |              |                 | •            |                | < 0.001 *            |
|                                   |              | •            | •               |              |                | < 0.001 *            |
|                                   |              | •            |                 | •            |                | 0.149                |
|                                   |              |              | •               | •            |                | < 0.001 *            |
| CD155<br>(BRAF-mutant cell lines) |              |              |                 |              |                |                      |
| Variable                          | NU (N = 16)  | Reg (N = 16) | Reg+NU (N = 16) | Vem (N = 16) | Total (N = 64) | P-value <sup>1</sup> |
| Mean±SD                           | 0.6±0.14     | 0.74±0.11    | 0.47±0.21       | 0.72±0.18    | 0.63±0.19      | < 0.001 *            |
| Median                            | 0.6          | 0.76         | 0.42            | 0.76         | 0.65           |                      |
| [Q1, Q3]                          | [0.53, 0.66] | [0.67, 0.83] | [0.35, 0.57]    | [0.53, 0.83] | [0.49, 0.8]    |                      |
| Min, Max                          | 0.35, 0.87   | 0.52, 0.9    | 0.16, 0.96      | 0.45, 1.01   | 0.16, 1.01     |                      |
|                                   | •            | •            | •               | •            |                | 0.004 *              |
|                                   | •            |              |                 |              |                | 0.035 *              |
|                                   | •            |              |                 | •            |                | 0.102                |
|                                   |              | •            | •               |              |                | < 0.001 *            |
|                                   |              | •            |                 | •            |                | 0.838                |
|                                   |              |              | •               | •            |                | 0.001 *              |
| HLA-I<br>(BRAF-mutant cell lines) |              |              |                 |              |                |                      |
| Variable                          | NU (N = 16)  | Reg (N = 16) | Reg+NU (N = 16) | Vem (N = 16) | Total (N = 64) | P-value <sup>1</sup> |
| Mean±SD                           | 1.05±0.17    | 1.32±0.41    | 1.53±0.86       | 1.33±0.56    | 1.31±0.57      | 0.02 *               |
| Median                            | 1.06         | 1.14         | 1.32            | 1.16         | 1.15           |                      |
| [Q1, Q3]                          | [0.99, 1.21] | [1.08, 1.34] | [1.14, 1.58]    | [1.05, 1.47] | [1.05, 1.38]   |                      |
| Min, Max                          | 0.61, 1.28   | 0.95, 2.31   | 0.97, 4.64      | 0.67, 2.95   | 0.61, 4.64     |                      |
|                                   | •            | •            | •               | •            |                | 0.039 *              |
|                                   | •            |              |                 |              |                | 0.001 *              |
|                                   | •            |              |                 | •            |                | 0.11                 |
|                                   |              | •            | •               |              |                | 0.184                |
|                                   |              | •            |                 | •            |                | 0.897                |
|                                   |              |              | •               | •            |                | 0.27                 |

\* p < 0.05

<sup>1</sup> Kruskal-Wallis test or Mann-Whitney U Test

**Supplementary Table S6: Differences in CD73, NGFR, and CD55 drug responses in BRAF-mutant cell lines**

| <b>CD73</b>                     |                    |                     |                        |                     |                       |                            |
|---------------------------------|--------------------|---------------------|------------------------|---------------------|-----------------------|----------------------------|
| <b>(BRAF-mutant cell lines)</b> |                    |                     |                        |                     |                       |                            |
| <b>Variable</b>                 | <b>NU (N = 10)</b> | <b>Reg (N = 10)</b> | <b>Reg+NU (N = 10)</b> | <b>Vem (N = 10)</b> | <b>Total (N = 40)</b> | <b>P-value<sup>1</sup></b> |
| Mean±SD                         | 0.67±0.3           | 0.7±0.22            | 0.46±0.29              | 0.91±0.31           | 0.68±0.32             | <b>0.01 *</b>              |
| Median                          | 0.59               | 0.67                | 0.33                   | 1.02                | 0.64                  |                            |
| [Q1, Q3]                        | [0.42, 0.94]       | [0.6, 0.86]         | [0.28, 0.48]           | [0.64, 1.14]        | [0.4, 0.95]           |                            |
| Min, Max                        | 0.34, 1.09         | 0.32, 1.05          | 0.22, 1.01             | 0.36, 1.28          | 0.22, 1.28            |                            |
|                                 | •                  | •                   |                        |                     |                       | 0.796                      |
|                                 | •                  |                     | •                      |                     |                       | <b>0.035 *</b>             |
|                                 | •                  |                     |                        | •                   |                       | 0.075                      |
|                                 |                    | •                   | •                      |                     |                       | <b>0.043 *</b>             |
|                                 |                    | •                   |                        | •                   |                       | 0.105                      |
|                                 |                    |                     | •                      | •                   |                       | <b>0.002 *</b>             |
| <b>NGFR</b>                     |                    |                     |                        |                     |                       |                            |
| <b>(BRAF-mutant cell lines)</b> |                    |                     |                        |                     |                       |                            |
| <b>Variable</b>                 | <b>NU (N = 8)</b>  | <b>Reg (N = 8)</b>  | <b>Reg+NU (N = 8)</b>  | <b>Vem (N = 8)</b>  | <b>Total (N = 8)</b>  | <b>P-value<sup>2</sup></b> |
| Mean±SD                         | 0.76±0.13          | 0.81±0.42           | 0.63±0.35              | 1.08±0.48           | 0.82±0.39             | 0.14 <sup>2</sup>          |
| Median                          | 0.77               | 0.71                | 0.54                   | 0.96                | 0.78                  |                            |
| [Q1, Q3]                        | [0.68, 0.85]       | [0.53, 0.94]        | [0.4, 0.74]            | [0.87, 1.29]        | [0.55, 0.95]          |                            |
| Min, Max                        | 0.54, 0.94         | 0.38, 1.63          | 0.26, 1.3              | 0.4, 2.03           | 0.26, 2.03            |                            |
| <b>CD55</b>                     |                    |                     |                        |                     |                       |                            |
| <b>(BRAF-mutant cell lines)</b> |                    |                     |                        |                     |                       |                            |
| <b>Variable</b>                 | <b>NU (N = 15)</b> | <b>Reg (N = 15)</b> | <b>Reg+NU (N = 15)</b> | <b>Vem (N = 15)</b> | <b>Total (N = 60)</b> | <b>P-value<sup>1</sup></b> |
| Mean±SD                         | 0.88±0.42          | 0.75±0.2            | 0.56±0.32              | 0.77±0.21           | 0.74±0.32             | <b>0.01 *</b>              |
| Median                          | 0.83               | 0.71                | 0.47                   | 0.75                | 0.68                  |                            |
| [Q1, Q3]                        | [0.64, 1]          | [0.6, 0.94]         | [0.4, 0.54]            | [0.64, 0.95]        | [0.5, 0.91]           |                            |
| Min, Max                        | 0.49, 2.17         | 0.42, 1.07          | 0.23, 1.48             | 0.42, 1.06          | 0.23, 2.17            |                            |
|                                 | •                  | •                   |                        |                     |                       | 0.539                      |
|                                 | •                  |                     | •                      |                     |                       | <b>0.002 *</b>             |
|                                 | •                  |                     |                        | •                   |                       | 0.624                      |
|                                 |                    | •                   | •                      |                     |                       | <b>0.007 *</b>             |
|                                 |                    | •                   |                        | •                   |                       | 0.744                      |
|                                 |                    |                     | •                      | •                   |                       | <b>0.011 *</b>             |

\* p < 0.05

<sup>1</sup> Kruskal-Wallis test or Mann-Whitney U Test

<sup>2</sup> Kruskal-Wallis test

**Supplementary Table S7: Differences in PD-L1, CD155, and HLA-I drug responses in NRAS-mutant cell lines**

| <b>PD-L1</b>                    |                    |                     |                        |                     |                       |                            |
|---------------------------------|--------------------|---------------------|------------------------|---------------------|-----------------------|----------------------------|
| <b>(NRAS-mutant cell lines)</b> |                    |                     |                        |                     |                       |                            |
| <b>Variable</b>                 | <b>NU (N = 10)</b> | <b>Reg (N = 10)</b> | <b>Reg+NU (N = 10)</b> | <b>Vem (N = 10)</b> | <b>Total (N = 40)</b> | <b>P-value<sup>1</sup></b> |
| Mean±SD                         | 0.51±0.2           | 0.72±0.13           | 0.36±0.16              | 1.43±0.39           | 0.75±0.48             | <b>&lt; 0.001 *</b>        |
| Median                          | 0.49               | 0.7                 | 0.33                   | 1.49                | 0.65                  |                            |
| [Q1, Q3]                        | [0.39, 0.64]       | [0.64, 0.77]        | [0.25, 0.47]           | [1.11, 1.56]        | [0.4, 0.99]           |                            |
| Min, Max                        | 0.24, 0.81         | 0.58, 1.03          | 0.15, 0.63             | 0.97, 2.28          | 0.15, 2.28            |                            |
|                                 | •                  | •                   |                        |                     |                       | <b>0.023 *</b>             |
|                                 | •                  |                     | •                      |                     |                       | 0.105                      |
|                                 | •                  |                     |                        | •                   |                       | <b>&lt; 0.001 *</b>        |
|                                 |                    | •                   | •                      |                     |                       | <b>&lt; 0.001 *</b>        |
|                                 |                    | •                   |                        | •                   |                       | <b>&lt; 0.001 *</b>        |
|                                 |                    |                     | •                      | •                   |                       | <b>&lt; 0.001 *</b>        |
| <b>CD155</b>                    |                    |                     |                        |                     |                       |                            |
| <b>(NRAS-mutant cell lines)</b> |                    |                     |                        |                     |                       |                            |
| <b>Variable</b>                 | <b>NU (N = 10)</b> | <b>Reg (N = 10)</b> | <b>Reg+NU (N = 10)</b> | <b>Vem (N = 10)</b> | <b>Total (N = 40)</b> | <b>P-value<sup>1</sup></b> |
| Mean±SD                         | 0.5±0.12           | 0.61±0.22           | 0.41±0.26              | 1.1±0.16            | 0.65±0.33             | <b>&lt; 0.001 *</b>        |
| Median                          | 0.48 [0.42, 0.56]  | 0.6 [0.52, 0.71]    | 0.36 [0.33, 0.42]      | 1.15 [1.02, 1.22]   | 0.58 [0.38, 0.94]     |                            |
| [Q1, Q3]                        |                    |                     |                        |                     |                       |                            |
| Min, Max                        | 0.3, 0.71          | 0.21, 0.95          | 0.13, 1.06             | 0.77, 1.27          | 0.13, 1.27            |                            |
|                                 | •                  | •                   |                        |                     |                       | 0.166                      |
|                                 | •                  |                     | •                      |                     |                       | 0.063                      |
|                                 | •                  |                     |                        | •                   |                       | <b>&lt; 0.001 *</b>        |
|                                 |                    | •                   | •                      |                     |                       | <b>0.035 *</b>             |
|                                 |                    | •                   |                        | •                   |                       | <b>&lt; 0.001 *</b>        |
|                                 |                    |                     | •                      | •                   |                       | <b>&lt; 0.001 *</b>        |
| <b>HLA-I</b>                    |                    |                     |                        |                     |                       |                            |
| <b>(NRAS-mutant cell lines)</b> |                    |                     |                        |                     |                       |                            |
| <b>Variable</b>                 | <b>NU (N = 9)</b>  | <b>Reg (N = 9)</b>  | <b>Reg+NU (N = 9)</b>  | <b>Vem (N = 9)</b>  | <b>Total (N = 36)</b> | <b>P-value<sup>1</sup></b> |
| Mean±SD                         | 1.09±0.21          | 1.34±0.4            | 1.39±0.49              | 0.86±0.15           | 1.17±0.39             | <b>0.003 *</b>             |
| Median                          | 1.1                | 1.31                | 1.26                   | 0.89                | 1.08                  |                            |
| [Q1, Q3]                        | [0.89, 1.27]       | [1.09, 1.44]        | [1.03, 1.58]           | [0.84, 0.91]        | [0.9, 1.31]           |                            |
| Min, Max                        | 0.79, 1.41         | 0.96, 2.27          | 0.86, 2.32             | 0.58, 1.07          | 0.58, 2.32            |                            |
|                                 | •                  | •                   |                        |                     |                       | 0.136                      |
|                                 | •                  |                     | •                      |                     |                       | 0.258                      |
|                                 | •                  |                     |                        | •                   |                       | <b>0.031 *</b>             |
|                                 |                    | •                   | •                      |                     |                       | 1                          |
|                                 |                    | •                   |                        | •                   |                       | <b>&lt; 0.001 *</b>        |
|                                 |                    |                     | •                      | •                   |                       | <b>0.004 *</b>             |

\* p < 0.05

<sup>1</sup> Kruskal-Wallis test or Mann-Whitney U Test



**Supplementary Table S8: Differences in CD73, NGFR, and CD55 drug responses in NRAS-mutant cell lines**

| <b>CD73</b>                     |                    |                     |                        |                     |                       |                            |
|---------------------------------|--------------------|---------------------|------------------------|---------------------|-----------------------|----------------------------|
| <b>(NRAS-mutant cell lines)</b> |                    |                     |                        |                     |                       |                            |
| <b>Variable</b>                 | <b>NU (N = 10)</b> | <b>Reg (N = 10)</b> | <b>Reg+NU (N = 10)</b> | <b>Vem (N = 10)</b> | <b>Total (N = 40)</b> | <b>P-value<sup>1</sup></b> |
| Mean±SD                         | 0.54±0.13          | 0.54±0.14           | 0.29±0.12              | 1.46±0.27           | 0.71±0.48             | <b>&lt; 0.001 *</b>        |
| Median                          | 0.5                | 0.52                | 0.27                   | 1.39                | 0.52                  |                            |
| [Q1, Q3]                        | [0.46, 0.67]       | [0.51, 0.66]        | [0.24, 0.32]           | [1.29, 1.69]        | [0.39, 0.82]          |                            |
| Min, Max                        | 0.35, 0.73         | 0.24, 0.71          | 0.13, 0.57             | 1.08, 1.84          | 0.13, 1.84            |                            |
|                                 | •                  | •                   |                        |                     |                       | 0.796                      |
|                                 | •                  |                     | •                      |                     |                       | <b>&lt; 0.001 *</b>        |
|                                 | •                  |                     |                        | •                   |                       | <b>&lt; 0.001 *</b>        |
|                                 |                    | •                   | •                      |                     |                       | <b>0.004 *</b>             |
|                                 |                    | •                   |                        | •                   |                       | <b>&lt; 0.001 *</b>        |
|                                 |                    |                     | •                      | •                   |                       | <b>&lt; 0.001 *</b>        |
| <b>NGFR</b>                     |                    |                     |                        |                     |                       |                            |
| <b>(NRAS-mutant cell lines)</b> |                    |                     |                        |                     |                       |                            |
| <b>Variable</b>                 | <b>NU (N = 7)</b>  | <b>Reg (N = 7)</b>  | <b>Reg+NU (N = 7)</b>  | <b>Vem (N = 7)</b>  | <b>Total (N = 28)</b> | <b>P-value<sup>1</sup></b> |
| Mean±SD                         | 0.66±0.13          | 1.03±0.84           | 0.75±0.57              | 1.12±0.22           | 0.89±0.53             | <b>0.04 *</b>              |
| Median                          | 0.68               | 0.68                | 0.71                   | 1.09                | 0.79                  |                            |
| [Q1, Q3]                        | [0.59, 0.72]       | [0.62, 1.07]        | [0.41, 0.87]           | [1.02, 1.21]        | [0.62, 1.04]          |                            |
| Min, Max                        | 0.47, 0.84         | 0.29, 2.81          | 0.11, 1.86             | 0.83, 1.49          | 0.11, 2.81            |                            |
|                                 | •                  | •                   |                        |                     |                       | 0.456                      |
|                                 | •                  |                     | •                      |                     |                       | 0.71                       |
|                                 | •                  |                     |                        | •                   |                       | <b>0.001 *</b>             |
|                                 |                    | •                   | •                      |                     |                       | 0.535                      |
|                                 |                    | •                   |                        | •                   |                       | 0.165                      |
|                                 |                    |                     | •                      | •                   |                       | 0.053                      |
| <b>CD55</b>                     |                    |                     |                        |                     |                       |                            |
| <b>(NRAS-mutant cell lines)</b> |                    |                     |                        |                     |                       |                            |
| <b>Variable</b>                 | <b>NU (N = 9)</b>  | <b>Reg (N = 9)</b>  | <b>Reg+NU (N = 9)</b>  | <b>Vem (N = 9)</b>  | <b>Total (N = 36)</b> | <b>P-value<sup>1</sup></b> |
| Mean±SD                         | 0.63±0.1           | 0.73±0.13           | 0.48±0.12              | 1.61±0.53           | 0.86±0.52             | <b>&lt; 0.001 *</b>        |
| Median                          | 0.59               | 0.69                | 0.49                   | 1.41                | 0.66                  |                            |
| [Q1, Q3]                        | [0.57, 0.69]       | [0.66, 0.83]        | [0.44, 0.56]           | [1.21, 1.67]        | [0.56, 0.97]          |                            |
| Min, Max                        | 0.5, 0.81          | 0.54, 0.91          | 0.25, 0.65             | 1.15, 2.6           | 0.25, 2.6             |                            |
|                                 | •                  | •                   |                        |                     |                       | 0.077                      |
|                                 | •                  |                     | •                      |                     |                       | <b>0.008 *</b>             |
|                                 | •                  |                     |                        | •                   |                       | <b>&lt; 0.001 *</b>        |
|                                 |                    | •                   | •                      |                     |                       | <b>&lt; 0.001 *</b>        |
|                                 |                    | •                   |                        | •                   |                       | <b>&lt; 0.001 *</b>        |
|                                 |                    |                     | •                      | •                   |                       | <b>&lt; 0.001 *</b>        |

\* p < 0.05

<sup>1</sup> Kruskal-Wallis test or Mann-Whitney U Test

**Supplementary Table S9: Fractional product analysis of Reg, anti-CD40, and STING agonist *in vivo* results**

| <b>Day</b> | <b>FTV:<br/>Reg</b> | <b>FTV:<br/>40/S</b> | <b>40/S+Reg<br/>Expected</b> | <b>40/S+Reg<br/>Observed</b> | <b>Ratio</b> |
|------------|---------------------|----------------------|------------------------------|------------------------------|--------------|
| 11         | 0.711               | 1.138                | 0.809                        | 0.505                        | <b>1.603</b> |
| 13         | 0.394               | 0.543                | 0.214                        | 0.189                        | <b>1.131</b> |
| 15         | 0.363               | 0.555                | 0.201                        | 0.140                        | <b>1.441</b> |
| 17         | 0.222               | 0.419                | 0.093                        | 0.105                        | <b>0.885</b> |
| 19         | 0.208               | 0.467                | 0.097                        | 0.091                        | <b>1.070</b> |
| 21         | 0.205               | 0.605                | 0.124                        | 0.086                        | <b>1.449</b> |
| 23         | 0.345               | 0.252                | 0.087                        | 0.110                        | <b>0.788</b> |
| 25         | 0.309               | 0.291                | 0.090                        | 0.078                        | <b>1.148</b> |

Synergy is defined as ratios > 1.0, additive effects as ratios = 1.0, and antagonistic effects as ratios < 1.0. Abbreviations: FTV = fractional tumor volume; 40 = anti-CD40; S = c-di-GMP (STING agonist).

**Supplementary Table S10: Fractional product analysis of Reg and adoptive cell transfer *in vivo* results**

| <b>Day</b> | <b>FTV:<br/>ACT</b> | <b>FTV:<br/>Reg</b> | <b>ACT+Reg<br/>Expected</b> | <b>ACT+Reg<br/>Observed</b> | <b>Ratio</b> |
|------------|---------------------|---------------------|-----------------------------|-----------------------------|--------------|
| 14         | 0.874               | 0.567               | 0.496                       | 0.478                       | <b>1.037</b> |
| 16         | 0.776               | 0.524               | 0.407                       | 0.381                       | <b>1.067</b> |
| 18         | 0.661               | 0.417               | 0.276                       | 0.301                       | <b>0.917</b> |
| 20         | 0.675               | 0.549               | 0.371                       | 0.285                       | <b>1.299</b> |
| 22         | 0.658               | 0.700               | 0.460                       | 0.260                       | <b>1.773</b> |
| 24         | 0.754               | 0.866               | 0.653                       | 0.276                       | <b>2.362</b> |
| 26         | 0.955               | 1.110               | 1.060                       | 0.415                       | <b>2.555</b> |

Synergy is defined as ratios > 1.0, additive effects as ratios = 1.0, and antagonistic effects as ratios < 1.0. Abbreviations: FTV = fractional tumor volume; ACT: adoptive cell therapy.
